# Supplementary material for: Fungicide Sensitivity Profile of Pyrenophora teres f. teres in Field Population
Source: MDPI journal article supplement (doi:10.3390/jof10040260), 2024-03-29
Supplement: s1 [file s1]

**Table S1.** Summary of Estonian *Pyrenophora teres f. teres* representative isolates and their GenBank accession numbers.

| Accession no | Representative isolate            | Fungicide target protein gene | Insert in promoter | Position of relevant aa alteration |
|--------------|-----------------------------------|-------------------------------|--------------------|------------------------------------|
| OR530176     | 22-PT-EE-36-02,<br>22-PT-EE-07-01 | <i>Cyp51A</i>                 | +                  | F489 (TTC)                         |
| OR761967     | 22-PT-EE-35-05                    | <i>Cyp51A</i>                 | -                  | F489 (TTC)                         |
| OR761968     | 22-PT-EE-38-09                    | <i>Cyp51A</i>                 | -                  | 489L (CTC)                         |
| OR761969     | 22-PT-EE-49-05                    | <i>Cyp51A</i>                 | -                  | 489L (TTA)                         |
| OR761970     | 22-PT-EE-05-05                    | <i>sdhD</i>                   | NA                 | 134R                               |
| OR761971     | 22-PT-EE-31-02                    | <i>sdhD</i>                   | NA                 | H134                               |
| OR761972     | 22-PT-EE-29-11                    | <i>sdhC</i>                   | NA                 | S135                               |
| OR761973     | 22-PT-EE-43-01                    | <i>sdhC</i>                   | NA                 | 135R                               |
| OR777246     | 22-PT-EE-41-10                    | <i>cyt B</i>                  | NA                 | F129                               |
| OR777247     | 22-PT-EE-49-08                    | <i>cyt B</i>                  | NA                 | 129L                               |
| OR777248     | 22-PT-EE-29-11                    | <i>sdhB</i>                   | NA                 | H277                               |
