# Supplementary material for: Fungicide Sensitivity Profile of Pyrenophora teres f. teres in Field Population
Source: MDPI journal article supplement (doi:10.3390/jof10040260), 2024-03-29
Supplement: s1 [file s1]

**Table S2.** Collection of Estonian *Pyrenopora teres f. teres* isolates with relevant data of fungicide target gene sequences and Genbank accession number of representative isolates.

| Isolate <sup>a</sup> | County   | Insert in CYP51A promoter | CYP51A <sup>b</sup> | Codon sequence in position 489 in CYP51A | SdhC | SdhD    | Cyt b | GenBank Accession Number   |
|----------------------|----------|---------------------------|---------------------|------------------------------------------|------|---------|-------|----------------------------|
| 22-PT-EE-05-01       | Ida-Viru | -                         | PttEE-A3            | CTC                                      | -    | D-H134R | -     | -                          |
| 22-PT-EE-05-02       | Ida-Viru | -                         | PttEE-A3            | CTC                                      | -    | D-H134R | -     | -                          |
| 22-PT-EE-05-03       | Ida-Viru | -                         | PttEE-A3            | CTC                                      | -    | D-H134R | -     | -                          |
| 22-PT-EE-05-04       | Ida-Viru | -                         | PttEE-A3            | CTC                                      | -    | D-H134R | -     | -                          |
| 22-PT-EE-05-05       | Ida-Viru | -                         | PttEE-A3            | CTC                                      | -    | D-H134R | -     | OR761970 ( <i>sdhD</i> )   |
| 22-PT-EE-05-06       | Ida-Viru | -                         | PttEE-A3            | CTC                                      | -    | D-H134R | -     | -                          |
| 22-PT-EE-05-07       | Ida-Viru | -                         | PttEE-A3            | CTC                                      | -    | D-H134R | -     | -                          |
| 22-PT-EE-05-08       | Ida-Viru | -                         | PttEE-A3            | CTC                                      | -    | D-H134R | -     | -                          |
| 22-PT-EE-05-09       | Ida-Viru | -                         | PttEE-A3            | CTC                                      | -    | D-H134R | -     | -                          |
| 22-PT-EE-05-10       | Ida-Viru | -                         | PttEE-A3            | CTC                                      | -    | D-H134R | -     | -                          |
| 22-PT-EE-07-01       | Ida-Viru | +                         | PttEE-A2            | TTC                                      | -    | D-H134R | -     | OR530176 ( <i>Cyp51A</i> ) |
| 22-PT-EE-07-02       | Ida-Viru | +                         | PttEE-A2            | TTC                                      | -    | D-H134R | -     | -                          |
| 22-PT-EE-07-03       | Ida-Viru | -                         | PttEE-A3            | CTC                                      | -    | -       | -     | -                          |
| 22-PT-EE-07-04       | Ida-Viru | -                         | PttEE-A3            | CTC                                      | -    | -       | -     | -                          |
| 22-PT-EE-09-01       | Ida-Viru | -                         | PttEE-A3            | CTC                                      | -    | -       | -     | -                          |
| 22-PT-EE-09-02       | Ida-Viru | -                         | PttEE-A3            | CTC                                      | -    | -       | -     | -                          |
| 22-PT-EE-09-03       | Ida-Viru | -                         | PttEE-A3            | CTC                                      | -    | -       | -     | -                          |
| 22-PT-EE-09-04       | Ida-Viru | -                         | PttEE-A3            | CTC                                      | -    | -       | -     | -                          |
| 22-PT-EE-09-05       | Ida-Viru | -                         | PttEE-A3            | CTC                                      | -    | -       | -     | -                          |
| 22-PT-EE-11-01       | Ida-Viru | -                         | PttEE-A3            | CTC                                      | -    | -       | -     | -                          |
| 22-PT-EE-11-02       | Ida-Viru | -                         | PttEE-A3            | CTC                                      | -    | -       | -     | -                          |
| 22-PT-EE-11-03       | Ida-Viru | -                         | PttEE-A3            | CTC                                      | -    | -       | -     | -                          |
| 22-PT-EE-16-03       | Jõgeva   | -                         | PttEE-A3            | CTC                                      | -    | D-H134R | -     | -                          |
| 22-PT-EE-16-04       | Jõgeva   | -                         | PttEE-A3            | CTC                                      | -    | D-H134R | -     | -                          |
| 22-PT-EE-16-09       | Jõgeva   | -                         | PttEE-A3            | CTC                                      | -    | D-H134R | -     | -                          |

|                |                |   |          |     |   |             |       |   |
|----------------|----------------|---|----------|-----|---|-------------|-------|---|
| 22-PT-EE-16-10 | Jõgeva         | - | PttEE-A3 | CTC | - | D-<br>H134R | -     | - |
| 22-PT-EE-23-01 | Jõgeva         | + | PttEE-A2 | TTC | - | D-<br>H134R | -     | - |
| 22-PT-EE-23-02 | Jõgeva         | + | PttEE-A2 | TTC | - | D-<br>H134R | -     | - |
| 22-PT-EE-23-03 | Jõgeva         | + | PttEE-A2 | TTC | - | D-<br>H134R | -     | - |
| 22-PT-EE-23-04 | Jõgeva         | + | PttEE-A2 | TTC | - | D-<br>H134R | -     | - |
| 22-PT-EE-23-05 | Jõgeva         | + | PttEE-23 | TTC | - | D-<br>H134R | -     | - |
| 22-PT-EE-23-06 | Jõgeva         | + | PttEE-23 | TTC | - | D-<br>H134R | -     | - |
| 22-PT-EE-02-01 | Järva          | - | PttEE-A3 | CTC | - | -           | -     | - |
| 22-PT-EE-13-01 | Järva          | - | PttEE-A3 | CTC | - | -           | -     | - |
| 22-PT-EE-13-02 | Järva          | - | PttEE-A3 | CTC | - | -           | -     | - |
| 22-PT-EE-13-03 | Järva          | - | PttEE-A3 | CTC | - | -           | -     | - |
| 22-PT-EE-13-04 | Järva          | - | PttEE-A3 | CTC | - | -           | -     | - |
| 22-PT-EE-13-05 | Järva          | - | PttEE-A3 | CTC | - | -           | -     | - |
| 22-PT-EE-13-06 | Järva          | - | PttEE-A3 | CTC | - | -           | -     | - |
| 22-PT-EE-13-07 | Järva          | - | PttEE-A3 | CTC | - | -           | -     | - |
| 22-PT-EE-14-01 | Järva          | - | PttEE-14 | TTC | - | -           | F129L | - |
| 22-PT-EE-14-02 | Järva          | - | PttEE-14 | TTC | - | -           | F129L | - |
| 22-PT-EE-14-03 | Järva          | - | PttEE-14 | TTC | - | -           | F129L | - |
| 22-PT-EE-28-01 | Lääne-<br>Viru | - | PttEE-A3 | CTC | - | -           | -     | - |
| 22-PT-EE-28-02 | Lääne-<br>Viru | - | PttEE-A3 | CTC | - | -           | -     | - |
| 22-PT-EE-28-03 | Lääne-<br>Viru | - | PttEE-A3 | CTC | - | -           | -     | - |
| 22-PT-EE-28-04 | Lääne-<br>Viru | - | PttEE-A3 | CTC | - | -           | -     | - |
| 22-PT-EE-28-05 | Lääne-<br>Viru | - | PttEE-A3 | CTC | - | -           | -     | - |
| 22-PT-EE-29-01 | Pärnu          | - | PttEE-A3 | CTC | - | -           | -     | - |
| 22-PT-EE-29-02 | Pärnu          | - | PttEE-A3 | CTC | - | -           | -     | - |
| 22-PT-EE-29-03 | Pärnu          | - | PttEE-A3 | CTC | - | -           | -     | - |
| 22-PT-EE-29-04 | Pärnu          | - | PttEE-A3 | CTC | - | -           | -     | - |
| 22-PT-EE-29-05 | Pärnu          | - | PttEE-A3 | CTC | - | -           | -     | - |
| 22-PT-EE-29-06 | Pärnu          | - | PttEE-A3 | CTC | - | -           | -     | - |
| 22-PT-EE-29-07 | Pärnu          | - | PttEE-A3 | CTC | - | -           | -     | - |
| 22-PT-EE-29-08 | Pärnu          | - | PttEE-A3 | CTC | - | -           | -     | - |
| 22-PT-EE-29-09 | Pärnu          | - | PttEE-A3 | CTC | - | -           | -     | - |
| 22-PT-EE-29-10 | Pärnu          | - | PttEE-A3 | CTC | - | -           | -     | - |

|                |       |   |          |     |             |             |       |                                                             |
|----------------|-------|---|----------|-----|-------------|-------------|-------|-------------------------------------------------------------|
| 22-PT-EE-29-11 | Pärnu | - | PttEE-A3 | CTC | -           | -           | -     | OR761972<br>( <i>sdhC</i> ),<br>OR777248<br>( <i>sdhB</i> ) |
| 22-PT-EE-29-12 | Pärnu | - | PttEE-A3 | CTC | -           | -           | -     | -                                                           |
| 22-PT-EE-29-14 | Pärnu | - | PttEE-A3 | CTC | -           | -           | -     | -                                                           |
| 22-PT-EE-31-01 | Pärnu | - | PttEE-A3 | CTC | C-<br>S135R | -           | F129L | -                                                           |
| 22-PT-EE-31-02 | Pärnu | - | PttEE-A3 | CTC | C-<br>S135R | -           | F129L | OR761971<br>( <i>sdhD</i> )                                 |
| 22-PT-EE-35-01 | Tartu | - | PttEE-A1 | TTC | -           | D-<br>H134R | -     | -                                                           |
| 22-PT-EE-35-02 | Tartu | - | PttEE-A1 | TTC | -           | D-<br>H134R | -     | -                                                           |
| 22-PT-EE-35-03 | Tartu | - | PttEE-A1 | TTC | -           | D-<br>H134R | -     | -                                                           |
| 22-PT-EE-35-04 | Tartu | - | PttEE-A1 | TTC | -           | D-<br>H134R | -     | -                                                           |
| 22-PT-EE-35-05 | Tartu | - | PttEE-A1 | TTC | -           | D-<br>H134R | -     | OR761967<br>( <i>Cyp51A</i> )                               |
| 22-PT-EE-35-06 | Tartu | - | PttEE-A3 | CTC | -           | -           | -     | -                                                           |
| 22-PT-EE-35-07 | Tartu | - | PttEE-A3 | CTC | -           | -           | -     | -                                                           |
| 22-PT-EE-35-08 | Tartu | - | PttEE-A1 | TTC | -           | D-<br>H134R | -     | -                                                           |
| 22-PT-EE-35-09 | Tartu | - | PttEE-A1 | TTC | -           | D-<br>H134R | -     | -                                                           |
| 22-PT-EE-35-10 | Tartu | - | PttEE-A1 | TTC | -           | D-<br>H134R | -     | -                                                           |
| 22-PT-EE-36-01 | Tartu | + | PttEE-A2 | TTC | -           | D-<br>H134R | -     | -                                                           |
| 22-PT-EE-36-02 | Tartu | + | PttEE-A2 | TTC | -           | D-<br>H134R | -     | OR530176<br>( <i>Cyp51A</i> )                               |
| 22-PT-EE-36-03 | Tartu | + | PttEE-A2 | TTC | -           | D-<br>H134R | -     | -                                                           |
| 22-PT-EE-36-04 | Tartu | + | PttEE-A2 | TTC | -           | D-<br>H134R | -     | -                                                           |
| 22-PT-EE-36-05 | Tartu | + | PttEE-A2 | TTC | -           | D-<br>H134R | -     | -                                                           |
| 22-PT-EE-36-06 | Tartu | + | PttEE-23 | TTC | -           | D-<br>H134R | -     | -                                                           |
| 22-PT-EE-36-07 | Tartu | + | PttEE-A2 | TTC | -           | D-<br>H134R | -     | -                                                           |
| 22-PT-EE-36-08 | Tartu | + | PttEE-A2 | TTC | -           | D-<br>H134R | -     | -                                                           |
| 22-PT-EE-36-09 | Tartu | + | PttEE-A2 | TTC | -           | D-<br>H134R | -     | -                                                           |
| 22-PT-EE-38-02 | Tartu | - | PttEE-A3 | CTC | C-<br>S135R | -           | -     | -                                                           |
| 22-PT-EE-38-05 | Tartu | - | PttEE-A3 | CTC | C-<br>S135R | -           | -     | -                                                           |
| 22-PT-EE-38-06 | Tartu | - | PttEE-A3 | CTC | C-<br>S135R | -           | F129L | -                                                           |

|                |          |   |          |     |             |             |       |                      |
|----------------|----------|---|----------|-----|-------------|-------------|-------|----------------------|
| 22-PT-EE-38-07 | Tartu    | - | PttEE-A3 | CTC | C-<br>S135R | -           | F129L | -                    |
| 22-PT-EE-38-08 | Tartu    | - | PttEE-A4 | TTA | C-<br>S135R | -           | F129L | -                    |
| 22-PT-EE-38-09 | Tartu    | - | PttEE-A3 | CTC | C-<br>S135R | -           | -     | OR761968<br>(Cyp51A) |
| 22-PT-EE-38-10 | Tartu    | - | PttEE-A3 | CTC | C-<br>S135R | -           | -     | -                    |
| 22-PT-EE-04-01 | Valga    | - | PttEE-A3 | CTC | -           | -           | -     | -                    |
| 22-PT-EE-41-01 | Valga    | - | PttEE-A3 | CTC | -           | -           | -     | -                    |
| 22-PT-EE-41-02 | Valga    | - | PttEE-A3 | CTC | -           | -           | -     | -                    |
| 22-PT-EE-41-03 | Valga    | - | PttEE-A3 | CTC | -           | -           | -     | -                    |
| 22-PT-EE-41-04 | Valga    | - | PttEE-A3 | CTC | -           | -           | -     | -                    |
| 22-PT-EE-41-05 | Valga    | - | PttEE-A3 | CTC | -           | -           | -     | -                    |
| 22-PT-EE-41-06 | Valga    | - | PttEE-A3 | CTC | -           | -           | -     | -                    |
| 22-PT-EE-41-07 | Valga    | - | PttEE-A3 | CTC | -           | -           | -     | -                    |
| 22-PT-EE-41-08 | Valga    | - | PttEE-A3 | CTC | -           | -           | -     | -                    |
| 22-PT-EE-41-09 | Valga    | - | PttEE-A3 | CTC | -           | -           | -     | -                    |
| 22-PT-EE-41-10 | Valga    | - | PttEE-A3 | CTC | -           | -           | -     | OR777246<br>(cytb)   |
| 22-PT-EE-43-01 | Valga    | - | PttEE-A3 | CTC | C-<br>S135R | -           | -     | OR761973<br>(SdhC)   |
| 22-PT-EE-43-02 | Valga    | - | PttEE-A3 | CTC | -           | D-<br>H134R | -     | -                    |
| 22-PT-EE-43-03 | Valga    | - | PttEE-A3 | CTC | -           | D-<br>H134R | -     | -                    |
| 22-PT-EE-43-04 | Valga    | - | PttEE-A3 | CTC | -           | D-<br>H134R | -     | -                    |
| 22-PT-EE-43-05 | Valga    | - | PttEE-A3 | CTC | -           | D-<br>H134R | -     | -                    |
| 22-PT-EE-03-02 | Viljandi | - | PttEE-A3 | CTC | -           | -           | -     | -                    |
| 22-PT-EE-03-03 | Viljandi | - | PttEE-A3 | CTC | -           | -           | -     | -                    |
| 22-PT-EE-03-04 | Viljandi | - | PttEE-A3 | CTC | -           | -           | -     | -                    |
| 22-PT-EE-03-05 | Viljandi | - | PttEE-A3 | CTC | -           | -           | -     | -                    |
| 22-PT-EE-03-06 | Viljandi | - | PttEE-A3 | CTC | -           | -           | -     | -                    |
| 22-PT-EE-03-07 | Viljandi | - | PttEE-A3 | CTC | -           | -           | -     | -                    |
| 22-PT-EE-01-01 | Võru     | - | PttEE-A3 | CTC | -           | -           | -     | -                    |
| 22-PT-EE-01-02 | Võru     | - | PttEE-A3 | CTC | -           | -           | -     | -                    |
| 22-PT-EE-01-03 | Võru     | - | PttEE-A3 | CTC | -           | -           | -     | -                    |
| 22-PT-EE-01-04 | Võru     | - | PttEE-A3 | CTC | -           | -           | -     | -                    |
| 22-PT-EE-01-05 | Võru     | - | PttEE-A3 | CTC | -           | -           | -     | -                    |
| 22-PT-EE-01-06 | Võru     | - | PttEE-A3 | CTC | -           | -           | -     | -                    |
| 22-PT-EE-01-07 | Võru     | - | PttEE-A3 | CTC | -           | -           | -     | -                    |
| 22-PT-EE-01-08 | Võru     | - | PttEE-A3 | CTC | -           | -           | -     | -                    |
| 22-PT-EE-45-01 | Võru     | - | PttEE-A3 | CTC | -           | -           | -     | -                    |
| 22-PT-EE-45-05 | Võru     | - | PttEE-A3 | CTC | -           | -           | -     | -                    |

|                |          |   |            |     |             |   |       |                               |
|----------------|----------|---|------------|-----|-------------|---|-------|-------------------------------|
| 22-PT-EE-45-06 | Võru     | - | PttEE-4506 | TTC | -           | - | -     | -                             |
| 22-PT-EE-45-07 | Võru     | - | PttEE-4507 | TTC | -           | - | -     | -                             |
| 22-PT-EE-45-08 | Võru     | - | PttEE-A3   | CTC | -           | - | -     | -                             |
| 22-PT-EE-49-01 | Võru     | - | PttEE-A3   | CTC | C-<br>S135R | - | F129L | -                             |
| 22-PT-EE-49-04 | Võru     | - | PttEE-A4   | TTA | C-<br>S135R | - | F129L | -                             |
| 22-PT-EE-49-05 | Võru     | - | PttEE-A4   | TTA | C-<br>S135R | - | F129L | OR761969<br>( <i>Cyp51A</i> ) |
| 22-PT-EE-49-06 | Võru     | - | PttEE-A4   | TTA | C-<br>S135R | - | F129L | -                             |
| 22-PT-EE-49-07 | Võru     | - | PttEE-A4   | TTA | C-<br>S135R | - | F129L | -                             |
| 22-PT-EE-49-08 | Võru     | - | PttEE-A4   | TTA | C-<br>S135R | - | F129L | OR777247<br>( <i>cytb</i> )   |
| 22-PT-EE-49-09 | Võru     | - | PttEE-A4   | TTA | C-<br>S135R | - | F129L | -                             |
| 22-PT-EE-49-10 | Võru     | - | PttEE-A4   | TTA | C-<br>S135R | - | F129L | -                             |
| 22-PT-EE-49-11 | Võru     | - | PttEE-A4   | TTA | C-<br>S135R | - | F129L | -                             |
| 22-PT-EE-50-01 | Võru     | - | PttEE-A4   | TTA | -           | - | -     | -                             |
| 22-PT-EE-50-02 | Võru     | - | PttEE-A4   | TTA | -           | - | -     | -                             |
| 22-PT-EE-50-03 | Võru     | - | PttEE-A4   | TTA | -           | - | -     | -                             |
| 22-PT-EE-50-04 | Võru     | - | PttEE-A4   | TTA | -           | - | -     | -                             |
| 22-PT-EE-50-05 | Võru     | - | PttEE-A4   | TTA | -           | - | -     | -                             |
| 22-PT-EE-50-06 | Võru     | - | PttEE-A4   | TTA | -           | - | -     | -                             |
| 22-PT-EE-50-07 | Võru     | - | PttEE-A4   | TTA | -           | - | -     | -                             |
| 21-PT-EE-04-02 | Ida-Viru | - | 21PttEE-15 | CTC | -           | - | -     | -                             |
| 21-PT-EE-04-05 | Ida-Viru | - | PttEE-A3   | CTC | -           | - | -     | -                             |
| 21-PT-EE-04-06 | Ida-Viru | - | PttEE-A3   | CTC | -           | - | -     | -                             |
| 21-PT-EE-04-07 | Ida-Viru | - | PttEE-A3   | CTC | -           | - | -     | -                             |
| 21-PT-EE-05-03 | Ida-Viru | - | PttEE-A3   | CTC | -           | - | -     | -                             |
| 21-PT-EE-05-04 | Ida-Viru | - | PttEE-A3   | CTC | -           | - | -     | -                             |
| 21-PT-EE-05-05 | Ida-Viru | - | PttEE-A3   | CTC | -           | - | -     | -                             |
| 21-PT-EE-05-06 | Ida-Viru | - | PttEE-A3   | CTC | -           | - | -     | -                             |
| 21-PT-EE-05-07 | Ida-Viru | - | PttEE-A3   | CTC | -           | - | -     | -                             |
| 21-PT-EE-18-01 | Ida-Viru | - | PttEE-A3   | CTC | -           | - | -     | -                             |
| 21-PT-EE-18-03 | Ida-Viru | - | PttEE-A3   | CTC | -           | - | -     | -                             |
| 21-PT-EE-18-04 | Ida-Viru | - | 21PttEE-15 | CTC | -           | - | -     | -                             |
| 21-PT-EE-18-05 | Ida-Viru | - | PttEE-A3   | CTC | -           | - | -     | -                             |
| 21-PT-EE-03-01 | Jõgeva   | - | PttEE-A3   | CTC | -           | - | -     | -                             |
| 21-PT-EE-03-02 | Jõgeva   | - | PttEE-A3   | CTC | -           | - | -     | -                             |
| 21-PT-EE-03-03 | Jõgeva   | - | PttEE-A3   | CTC | -           | - | -     | -                             |
| 21-PT-EE-03-06 | Jõgeva   | - | PttEE-A3   | CTC | -           | - | -     | -                             |

|                |            |   |            |     |         |   |       |   |
|----------------|------------|---|------------|-----|---------|---|-------|---|
| 21-PT-EE-06-01 | Lääne-Viru | - | PttEE-A3   | CTC | -       | - | -     | - |
| 21-PT-EE-06-04 | Lääne-Viru | - | PttEE-A3   | CTC | -       | - | -     | - |
| 21-PT-EE-06-06 | Lääne-Viru | - | PttEE-A3   | CTC | -       | - | -     | - |
| 21-PT-EE-11-01 | Saare      | - | PttEE-A3   | CTC | -       | - | -     | - |
| 21-PT-EE-11-02 | Saare      | - | PttEE-A3   | CTC | -       | - | -     | - |
| 21-PT-EE-11-03 | Saare      | - | PttEE-A3   | CTC | -       | - | -     | - |
| 21-PT-EE-11-04 | Saare      | - | PttEE-A3   | CTC | -       | - | -     | - |
| 21-PT-EE-07-01 | Tartu      | - | PttEE-A3   | CTC | C-S135R | - | F129L | - |
| 21-PT-EE-07-02 | Tartu      | - | PttEE-A3   | CTC | C-S135R | - | F129L | - |
| 21-PT-EE-07-03 | Tartu      | - | PttEE-A3   | CTC | C-S135R | - | F129L | - |
| 21-PT-EE-07-04 | Tartu      | - | PttEE-A3   | CTC | C-S135R | - | F129L | - |
| 21-PT-EE-07-05 | Tartu      | - | PttEE-A3   | CTC | C-S135R | - | F129L | - |
| 21-PT-EE-07-06 | Tartu      | - | PttEE-A3   | CTC | C-S135R | - | F129L | - |
| 21-PT-EE-07-07 | Tartu      | - | PttEE-A3   | CTC | C-S135R | - | F129L | - |
| 21-PT-EE-07-08 | Tartu      | - | PttEE-A3   | CTC | C-S135R | - | F129L | - |
| 21-PT-EE-08-01 | Tartu      | - | PttEE-A3   | CTC | -       | - | -     | - |
| 21-PT-EE-08-02 | Tartu      | - | PttEE-A3   | CTC | -       | - | -     | - |
| 21-PT-EE-08-03 | Tartu      | - | PttEE-A3   | CTC | -       | - | -     | - |
| 21-PT-EE-08-04 | Tartu      | - | PttEE-A3   | CTC | -       | - | -     | - |
| 21-PT-EE-09-02 | Tartu      | - | PttEE-A3   | CTC | -       | - | -     | - |
| 21-PT-EE-09-03 | Tartu      | - | PttEE-A3   | CTC | -       | - | -     | - |
| 21-PT-EE-09-04 | Tartu      | - | PttEE-A3   | CTC | -       | - | -     | - |
| 21-PT-EE-15-01 | Võru       | - | PttEE-A3   | CTC | C-S135R | - | F129L | - |
| 21-PT-EE-15-02 | Võru       | - | PttEE-A3   | CTC | C-S135R | - | F129L | - |
| 21-PT-EE-15-03 | Võru       | - | 21PttEE-15 | CTC | C-S135R | - | F129L | - |
| 21-PT-EE-15-04 | Võru       | - | PttEE-A3   | CTC | C-S135R | - | F129L | - |
| 21-PT-EE-15-05 | Võru       | - | PttEE-A3   | CTC | C-S135R | - | F129L | - |
| 21-PT-EE-15-06 | Võru       | - | PttEE-A3   | CTC | C-S135R | - | F129L | - |
| 21-PT-EE-15-07 | Võru       | - | PttEE-A3   | CTC | C-S135R | - | F129L | - |
| 21-PT-EE-15-08 | Võru       | - | PttEE-A3   | CTC | C-S135R | - | F129L | - |

|                |      |   |          |     |   |   |   |   |
|----------------|------|---|----------|-----|---|---|---|---|
| 21-PT-EE-16-01 | Võru | - | PttEE-A3 | CTC | - | - | - | - |
| 21-PT-EE-16-02 | Võru | - | PttEE-A3 | CTC | - | - | - | - |
| 21-PT-EE-16-05 | Võru | - | PttEE-A3 | CTC | - | - | - | - |
| 21-PT-EE-16-06 | Võru | - | PttEE-A3 | CTC | - | - | - | - |
| 21-PT-EE-16-08 | Võru | - | PttEE-A3 | CTC | - | - | - | - |
| 21-PT-EE-16-10 | Võru | - | PttEE-A3 | CTC | - | - | - | - |

<sup>a</sup> Isolate number starting with 21 or 22 indicates collection year 2011 or 2022, respectively.

<sup>b</sup> types of CYP51A haplotype according to this study, Table 2.
