# Supplementary figures and images for: Fungicide Sensitivity Profile of Pyrenophora teres f. teres in Field Population
Source: MDPI journal article supplement (doi:10.3390/jof10040260), 2024-03-29

# insert (129 bp)

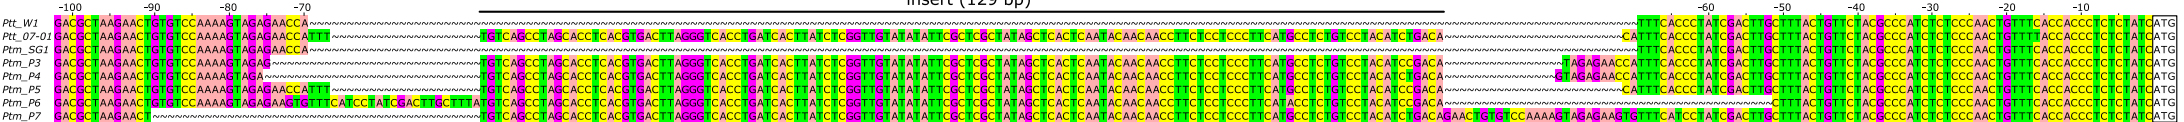

Supplement: s1 [file s1]
